# Supplementary material for: Longitudinal associations of gross motor development, motor milestone achievement and weight-for-length z score in a racially diverse cohort of US infants
Source: PubMed Central journal article supplement — BMJ Open. 2019 Jan 15;9(1):e024440. doi: 10.1136/bmjopen-2018-024440 (PMC6340444; doi:10.1136/bmjopen-2018-024440), 2019-01-15
Supplement: bmjopen-2018-024440.draft_revisions.pdf [file bmjopen-2018-024440.draft_revisions.pdf]

# BMJ Open

BMJ Open is committed to open peer review. As part of this commitment we make the peer review history of every article we publish publicly available.

When an article is published we post the peer reviewers' comments and the authors' responses online. We also post the versions of the paper that were used during peer review. These are the versions that the peer review comments apply to.

The versions of the paper that follow are the versions that were submitted during the peer review process. They are not the versions of record or the final published versions. They should not be cited or distributed as the published version of this manuscript.

BMJ Open is an open access journal and the full, final, typeset and author-corrected version of record of the manuscript is available on our site with no access controls, subscription charges or pay-per-view fees (<http://bmjopen.bmj.com>).

If you have any questions on BMJ Open's open peer review process please email [info.bmjopen@bmj.com](mailto:info.bmjopen@bmj.com)

# BMJ Open

## Gross motor development, motor milestone achievement, and obesity in a racially diverse cohort of US infants

|                               |                                                                                                                                                                                                                                                                                                   |
|-------------------------------|---------------------------------------------------------------------------------------------------------------------------------------------------------------------------------------------------------------------------------------------------------------------------------------------------|
| Journal:                      | <i>BMJ Open</i>                                                                                                                                                                                                                                                                                   |
| Manuscript ID                 | bmjopen-2018-024440                                                                                                                                                                                                                                                                               |
| Article Type:                 | Research                                                                                                                                                                                                                                                                                          |
| Date Submitted by the Author: | 29-May-2018                                                                                                                                                                                                                                                                                       |
| Complete List of Authors:     | Shoaibi, Azza; Medical University of South Carolina - College of Medicine, Public Health Sciences<br>Neelon, Brian; The Medical University of South Carolina, Biostats<br>Ostbye, Truls; Duke University<br>Benjamin Neelon, Sara E.; Johns Hopkins University, Bloomberg School of Public Health |
| Keywords:                     | Developmental milestones, Gross motor, Infant, Motor milestones, Obesity                                                                                                                                                                                                                          |
|                               |                                                                                                                                                                                                                                                                                                   |

SCHOLARONE™  
Manuscripts

Peer Review Only

1  
2  
3 **Gross motor development, motor milestone achievement, and obesity in a racially diverse**  
4 **cohort of US infants**  
5  
6

7  
8  
9  
10 Azza Shoaibi, PhD,<sup>1</sup> Brian Neelon, PhD,<sup>1</sup> Truls Østbye, MD, PhD,<sup>2</sup> Sara E Benjamin-Neelon,  
11 PhD, JD.<sup>3</sup>  
12  
13

14  
15  
16  
17 <sup>1</sup>Department of Public Health Sciences, Medical University of South Carolina, Charleston, South  
18 Carolina 29425; <sup>2</sup>Department of Community and Family Medicine, Duke University Medical  
19 Center, Durham, North Carolina 27705; <sup>3</sup>Department of Health, Behavior and Society, Johns  
20 Hopkins Bloomberg School of Public Health, Baltimore, Maryland 21205.  
21  
22  
23

24  
25  
26  
27  
28 **Email addresses:** shoaibi@musc.edu; neelon@musc.edu; truls.ostbye@duke.edu;  
29 sara.neelon@jhu.edu.  
30  
31

32  
33  
34  
35 **Address correspondence to:**  
36

37 Azza Shoaibi PhD,  
38  
39 Post doctorate fellow  
40

41  
42 Department of Public Health Sciences, Biomedical Informatics Center  
43

44 Medical University of South Carolina,  
45

46 135 cannon, Charleston, South Carolina 29425 USA  
47

48 [shoaibi@musc.edu](mailto:shoaibi@musc.edu). Tel: 803-201-7303  
49  
50

51  
52  
53  
54 Word count: 2757  
55  
56  
57  
58

## Abstract

**Objectives:** To investigate longitudinal associations between gross motor development, motor milestone achievement, and obesity in a sample of infants. In a secondary aim, we explored potential bidirectional relationships, as early obesity may impede motor development and poor motor development may lead to obesity.

**Design:** The design was an observational birth cohort.

**Setting:** We used data from the Nurture study, a birth cohort of predominately black women and their infants residing in the southeastern United States.

**Participants:** 666 women enrolled their infants in Nurture. For the present study, we excluded infants with missing data on exposure, outcome, or main covariates, leaving a total analytic sample of 425 infants.

**Primary outcome:** The main outcome was weight-for-length z-score, measured when infants were 3, 6, 9, and 12 months.

**Results:** Among infants, 64.7% were black, 18.8% were white, and 16.9% were other/multiple race. Mean (SD) breastfeeding duration was 17.6 (19.7) weeks. Just over one-third (38.5%) had an annual household income of < \$20,000. After adjusting for potential confounders, higher motor development score was associated with lower weight-for-length z-score (-0.004; 95% CI -0.001, -0.007; p=0.01), mainly driven by associations among males (-0.007; 95% CI -0.014, -0.001; p=0.03) and not females (0.001; 95% CI -0.005, 0.008; p=0.62). Earlier crawling was the only milestone associated with a lower weight-for-length z-score at 12 months (-0.328; 95% CI -0.585, 0.072; p=0.012). However, this association appeared to be driven by among male infants only (-0.461; 95% CI -0.825--0.096; P=0.01). Weight-for-length z-score was unrelated to subsequent motor development score and was thus not bidirectional in our sample.

1  
2  
3  
4  
5 **Conclusions:** Higher motor development score and earlier crawling were associated with lower  
6  
7 subsequent weight-for-length z-score. However, male infants appeared to influence these  
8  
9 associations. These findings contribute to the growing body of evidence suggesting that delayed  
10  
11 motor development may be associated with later obesity.  
12  
13  
14

15  
16  
17 **Strengths and limitations of this study:**  
18

- 19  
20
- 21 • This study includes multiple prospective measures of motor development and obesity,  
22 which allowed for careful assessment of the temporality of the relationship between the  
23 two.  
24
  - 25 • Previous studies have not included sufficient representation of participants from racial  
26 minority groups. This cohort consists of predominately black women and infants.  
27
  - 28 • We were not able to follow infants in the Nurture sample beyond 12 months of age.  
29
  - 30 • Nurture participants were not representative of the larger population in the southeastern  
31 US.  
32
  - 33 • We experienced attrition from birth to the 12-month follow-up; approximately 29% of  
34 mothers and their infants withdrew or were lost to follow-up.  
35  
36  
37  
38  
39  
40  
41  
42  
43  
44

45 **Key words:** Developmental milestones; Gross motor; Infant; Motor milestones; Obesity  
46  
47  
48  
49  
50  
51  
52  
53  
54  
55  
56  
57  
58  
59  
60

## Background

Early childhood is a critical period for preventing obesity and its related complications.[1-3] Identifying early predictors of excessive weight gain can help inform effective interventions to prevent later obesity.[4] As a result, recent calls to action highlight the importance of promoting gross motor activity and decreasing sedentary time for very young children.[5-9] While there is evidence of an association between gross motor activity and obesity in early childhood,[10-18] findings from previous studies have not been consistent—perhaps due to bidirectional relationships among these variables.

Some studies have shown that excess adiposity may impede movement and compromise motor development.[16-18] In one study, obesity and excess subcutaneous fat were associated with delayed motor development, but motor development was unrelated to subsequent weight status.[18] Another study found that heavier infants sat up without support earlier, but weight status was largely unrelated to other motor milestones.[19]

Other studies suggest that physical activity and gross motor movement may provide opportunities to expend energy and may help prevent obesity.[20, 21] Earlier attainment of gross motor milestones, such as crawling and walking, may provide opportunities for infants to move regularly, increasing movement and thus energy expenditure.[15] Given the conflicting findings and the potential complexity of the relationship, we investigated longitudinal associations between gross motor development and obesity, and explored potential bidirectional relationships, in a sample of racially diverse infants.

## Methods

### Study design and population

We used data from the Nurture study, a birth cohort of predominately black women and their infants residing in the southeastern United States (US).[22] The overall goal of Nurture is to identify factors related to feeding, physical activity, sleep, and stress that contribute to excessive weight gain in infancy, focusing on the role of various caregivers. Between 2013 and 2015, we enrolled women in the study in later pregnancy and confirmed participations shortly after birth. Women provided written, informed consent for themselves and their infants to participate in the study. The Institutional Review Board of Duke University Medical Center approved this study and its protocol.

Trained data collectors conducted home visits when infants were 3, 6, 9, and 12 months of age. In addition, women received automated interactive voice response (IVR) telephone calls in months 1, 2, 4, 5, 7, 8, 10 and 11 to assess a limited set of behaviors, including infant motor milestone achievement. Of the 666 women who enrolled their infants in Nurture after birth, 535 (80.3%) completed the 3-month home visit, 497 (74.6%) completed the 6-month visit, 457 (68.6%) completed the 9-month visit, and 468 (70.3%) completed the 12-month visit. For the present study, we excluded infants with missing data on weight-for-length z-scores at 12 months (n=35) leaving 433 infants. We further excluded those with missing information on covariates included in all models *a priori* and those with missing motor development scores or non-biologically plausible motor milestone data (n=8), leaving a total analysis sample of 425 infants.

We conducted two distinct sets of analyses. First, we examined associations between motor

1  
2  
3 development measured using the Bayley Scales of Infant and Toddler Development: Third  
4 Edition[23] and weight-for-length z-score. We hypothesized that poor motor development  
5  
6 would be associated with higher weight-for-length z-scores longitudinally throughout infancy.  
7  
8  
9  
10 Second, we examined associations of gross motor milestone achievement (rolling over, sitting  
11  
12 up, crawling, and walking) and weight-for-length z-score. We hypothesized that delayed  
13  
14 achievement of motor milestones would be associated with higher weight for length z-score at 12  
15  
16 months.  
17  
18  
19  
20

### 21 **Exposure: Motor development and motor milestones**

22  
23 We used two measures to define motor development. First, we used the Bayley Scales of Infant  
24 and Toddler Development: Third Edition to measure motor development of infants at each home  
25  
26 visit at 3, 6, 9, and 12 months. This is an individually-administrated test that has been designed  
27  
28 to assess children development in 5 different functional areas: fine motor, gross motor,  
29  
30 cognition, language, social emotion, and adaptive. For this study, we used the motor composite  
31  
32 score—the sum of the fine and gross motor scores. The fine motor score comprises of 66 items,  
33  
34 which assess fine perceptual-motor integration, motor planning and speed, visual tracking,  
35  
36 reaching, object grasping, object manipulation, functional hand skills, and responses to tactile  
37  
38 information. The gross motor score comprises of 72 items, which asses the movement of limbs  
39  
40 and torso, static positions, dynamic movement balance and motor planning. The descriptive  
41  
42 classification of Bayley Scales of Infant and Toddler Development includes 7 ordinal categories:  
43  
44 extremely low score (composite score of 69 and below), borderline (composite score of 70 to  
45  
46 79), low average (composite score of 80-89), average (composite score of 90 to 109), high  
47  
48 average (composite score of 110 to119), superior (composite score of 120 to129), and very  
49  
50  
51  
52  
53  
54  
55  
56  
57  
58  
59  
60



1  
2  
3 superior (composite score of 130 and above). To allow our results to be comparable with  
4  
5 previous studies,[16, 18] we used the sum of the fine and gross motor scores for the first  
6  
7 analysis. However, we also examined gross motor development score only, as we were most  
8  
9 interested in motor development as a marker of physical activity.  
10  
11  
12  
13

14  
15 Second, mothers reported whether their infants had achieved each of 4 gross motor milestones  
16  
17 monthly during the IVR call: rolling over without assistance, sitting up without assistance,  
18  
19 crawling using all four limbs, and walking without assistance. We categorized age of  
20  
21 achievement into 3 groups based on World Health Organization (WHO) windows for motor  
22  
23 milestone achievement[24] and consistent with our previous study.[15] We collapsed groups  
24  
25 that contained fewer than 25 infants. Infants who were not able to achieve a particular milestone  
26  
27 by the end of the study period were included in the oldest possible age category.  
28  
29  
30  
31  
32

### 33 **Outcome: Weight-for-length z-score**

34  
35 Trained data collectors measured infant weight and length at each home visit—recumbent length  
36  
37 to the nearest 1/8th inch and weight to the nearest 0.1 pound in triplicate. We calculated age-  
38  
39 and sex-specific weight-for-length z-scores using WHO reference standards.[25]  
40  
41  
42  
43

### 44 **Other measures**

45  
46 We collected demographic information from mothers via interviews and questionnaires at  
47  
48 recruitment, at birth, during IVR calls, and during each home visit. Infant variables of interest  
49  
50 included age, gender, birth weight for gestational age z-score, race (black, white, other). We  
51  
52 abstracted information on infant birth weight in grams and length in centimeters from the  
53  
54  
55  
56  
57  
58  
59  
60

1  
2  
3 medical record. We calculated birth weight for gestational age z-score using international  
4 reference data put forth by Intergrowth-21st Newborn Birth Weight Standards and Z Scores.[26]  
5  
6 Maternal variables of interest included age, education ( $\leq$ high school graduate, some college,  
7 college graduate, or graduate degree), household income ( $<$ \$20,000,  $\geq$ \$20,000), and pre-  
8 pregnancy body mass index (BMI). We also documented breastfeeding status during each IVR  
9 call and calculated the total number of months of any breastfeeding for each infant.  
10  
11  
12  
13  
14  
15  
16  
17  
18

### 19 **Statistical analysis**

20 We calculated means and standard deviations (SD) for continuous demographic variables and  
21 percentages for categorical variables. We explored mean trajectories of both motor development  
22 score and weight-for-length z-score at 3, 6, 9, and 12 months for male and female infants,  
23 separately. In the first analysis, we examined the association between motor development score  
24 and weight-for-length z-score at a subsequent visit using lagged repeated-measures linear  
25 regression. A first-order autoregressive covariance structure to account for association between  
26 the repeated measures among infants. We included all covariates discussed above in the model.  
27 We also ran the same model to examine the association between gross motor development score  
28 only and subsequent weight-for-length z-score. Additionally, as some studies have suggested a  
29 bidirectional association between motor development and weight status, we investigated the  
30 effect of weight-for-length z-score at an earlier visit on motor development score at a given  
31 current visit. For example, when predicting weight-for-length z-score at the 6-month visit, we  
32 used motor development score at the 3-month visit. We took this approach to ensure that the  
33 exposure preceded the outcome.  
34  
35  
36  
37  
38  
39  
40  
41  
42  
43  
44  
45  
46  
47  
48  
49  
50  
51  
52  
53  
54  
55  
56  
57  
58  
59  
60

1  
2  
3 In the second analysis, we used a separate linear regressions to investigate the association  
4 between age at achievement of each of the 4 milestones and weight-for-length z-score at 12  
5 months. We included the same covariates of interest in the models. To explore differences by  
6 gender, we ran the same models separately among female and males. We present results in terms  
7 of parameter estimates, 95% CI, and two-sided p values. We conducted all analyses using SAS  
8 9.4 (SAS Institute, Cary, North Carolina, USA) at a significance level of <0.05.  
9  
10  
11  
12  
13  
14  
15  
16  
17  
18

## 19 Results

20  
21 Among infants, 50.6% were female and 49.4% were male (Table 1). The mean (SD) birth  
22 weight for gestational age z-score was -0.28 (0.95). In terms of race, 64.7% of infants were  
23 black, 18.8% were white, and 16.9% were of 'other' race. The mean (SD) breastfeeding duration  
24 was 17.6 (19.7) weeks. Among mothers, 44.1% had some college, college graduate, or graduate  
25 degree, and 55.9 % were married or living with partner. Just over one-third (38.5%) had an  
26 annual household income of less than \$20,000. Mothers had a mean (SD) pre-pregnancy BMI of  
27 30.6 (9.4) and age of 28.13 (5.08) years.  
28  
29  
30  
31  
32  
33  
34  
35  
36  
37  
38  
39

40 [INSERT TABLE 1 HERE]  
41  
42  
43

44 Figure 1 illustrates the mean (SD) of motor development scores and weight-for-length z-scores  
45 over time among males and females, separately. As Figure 1 (a) shows, motor development  
46 scores decreased slightly over infancy, with a mean of 109.67 (11.90) at birth and 97.87 (10.66)  
47 at 12 months. Figure 1 (b) shows an increasing trend for weight-for-length z-scores, indicating  
48 that infants got relatively heavier throughout the assessment period. In this sample, the mean  
49  
50  
51  
52  
53  
54  
55  
56  
57  
58  
59  
60

1  
2  
3 weight-for-length z-score was 0.14 (1.03) at birth and increased to 0.64 (1.01) at 12 months.  
4  
5  
6

7  
8 [INSERT FIGURE 1 HERE]  
9

10  
11  
12 After adjusting for potential confounders, higher motor development score was associated with  
13 lower weight-for-length z-score (-0.004; 95% CI -0.001, -0.007; p=0.01) (Table 2). For every  
14 10-unit increase in motor development score (measured at a previous visit), weight-for-length z-  
15 score decreased by 0.04 on average. In the stratified analysis, higher motor development score  
16 was associated with lower weight-for-length z-score (at the subsequent assessment) among males  
17 (-0.007; 95% CI -0.014, -0.001; p=0.03) but not females (0.001; 95% CI -0.005, 0.008; p=0.62).  
18  
19 Similarly, when we examined gross motor score only, higher motor development score was  
20 associated with lower weight-for-length z-score (-0.018; 95% CI -0.031, -0.004; p=0.01). This  
21 association appeared driven by male infants only (-0.033; 95% CI -0.064, -0.003; p=0.03).  
22  
23  
24  
25  
26  
27  
28  
29  
30  
31  
32  
33  
34

35 [INSERT TABLE 2 HERE]  
36  
37  
38  
39

40 Earlier achievement of rolling over, sitting up, and walking were not associated with weight-for-  
41 length z-score at 12 months (Table 3). However, earlier crawling was associated with lower  
42 weight-for-length z-score at 12 months: infants who crawled at 6 months or younger had an  
43 average z-score 0.328 lower than those who crawled at 9 months or older (-0.328; 95% CI -  
44 0.585, 0.072; p=0.012). In stratified analyses, we observed this association in male infants only  
45 (-0.461; 95% CI -0.825, -0.096; P=0.01). Finally, weight-for-length z-score was unrelated to  
46 subsequent motor development score (0.074; 95% CI -0.805, 0.955; P=0.87), and thus the  
47  
48  
49  
50  
51  
52  
53  
54  
55  
56  
57  
58  
59  
60

1  
2  
3 association appears to be primarily from motor development to weight status rather than vice  
4  
5 versa.  
6  
7  
8  
9

10 [INSERT TABLE 3 HERE]  
11  
12  
13

## 14 **Discussion**

15  
16 Among this sample of racially diverse infants, we found that higher motor development score  
17 was associated with lower subsequent weight-for-length z-score. We also found that earlier  
18 crawling was associated with lower weight-for-length z-score at 12 months. However, earlier  
19 achievement of the other 3 gross motor milestones was not associated weight-for-length z-score  
20 at 12 months. Multiple studies found that delayed or poor motor development was associated  
21 with excessive weight among infants and young children,[15] although a few found no  
22 association.[18, 27] There are some differences in these studies in the timing and the method of  
23 assessing both motor development and obesity. For example, a study of 25,148 children in  
24 Denmark showed that later achievement of motor milestones (sitting up and walking) was not  
25 associated with overweight at age 7 years, and later achievement of motor milestones was not a  
26 substantial risk factor for later increasing BMI.[28] Infant motor milestone achievement was  
27 reported retrospectively by mothers in this study. Nevertheless, their results support our finding  
28 that sitting up and walking were not associated with later weight. However, another study  
29 reported significant associations of age of achievement of rolling over, sitting up, and walking  
30 but not crawling with adiposity at age 3 year. Motor milestone achievement was also reported  
31 retrospectively by mothers. Also relevant to our study, Slining et al.<sup>18</sup> found that overweight  
32 infants were more likely to have concurrent delayed motor development among a sample of low-  
33  
34  
35  
36  
37  
38  
39  
40  
41  
42  
43  
44  
45  
46  
47  
48  
49  
50  
51  
52  
53  
54  
55  
56  
57  
58  
59  
60

1  
2  
3 income African-American infants. However, in contrast to our findings, motor development was  
4 unrelated to subsequent anthropometry. We used Bayley Scales of Infant and Toddler  
5 Development: Third Edition[23] (the composite motor score) to measure motor development of  
6 infant while Sling et al. used the second edition of the same scale. This might explain some of  
7 the differences in the findings. To test the sensitivity of our findings to the measure of exposure,  
8 we performed the analysis using the gross motor development score only and found similar  
9 results.  
10  
11  
12  
13  
14  
15  
16  
17  
18  
19  
20

21 We also observed clear differences by gender. Higher motor development score was associated  
22 with lower weight-for-length z-score among males but not females in our sample of infants.  
23 Additionally, among males only, earlier crawling was associated with lower weight-for-length z-  
24 score at 12 months. Previous studies examining this research question did not present  
25 differences by gender.[18, 28] However, in studies of older children, and consistent with our  
26 findings, researchers observed differences in motor development among boys only.[12, 14, 29]  
27 In these prior studies, obesity in boys was associated with poorer gross motor performance. As a  
28 possible explanation, the researchers suggest that society may put greater pressure on boys to  
29 participate in physical activity from a young age—boys who opt out of these activities may not  
30 have the same opportunity to fully develop their motor skills.[12, 29] The researchers  
31 hypothesize that gender-specific associations between obesity and motor development  
32 impairment may be evident in even younger children, and suggest further research. A recent  
33 systematic review notes a positive relation between physical activity and motor milestone  
34 achievement, which could help explain the association.[30]  
35  
36  
37  
38  
39  
40  
41  
42  
43  
44  
45  
46  
47  
48  
49  
50  
51  
52  
53  
54  
55  
56  
57  
58  
59  
60

1  
2  
3 Another explanation could be physiological differences in body composition between males and  
4 females in infancy. There is some evidence that very young male and female infants show  
5 differences in body fat and fat-free mass percentages, with girls having more fat mass at one  
6 month of age.[31] However, these differences by gender were no longer evident by 6  
7 months.[31] Other studies have essentially found no differences in infant percent body fat by  
8 gender.[32] We consistently observed associations between motor development and weight-for-  
9 length z-score in male infants only and agree that this finding warrants further exploration.  
10  
11  
12  
13  
14  
15  
16  
17  
18  
19  
20

21 Regardless, motor development in infancy may influence a number of behaviors and outcomes in  
22 later childhood. Prior studies suggest that earlier attainment was associated with educational  
23 achievement,[33] intelligence,[34, 35] and executive function[27] in later life. Moreover, motor  
24 milestone achievement within normal windows during infancy was associated with better  
25 physical performance[36] and greater grip strength[37] in middle adulthood. Unfortunately, we  
26 were not able to follow infants in the Nurture sample beyond 12 months of age. Future studies  
27 may consider longer follow-up periods to more fully assess outcomes throughout childhood.  
28  
29  
30  
31  
32  
33  
34  
35  
36  
37  
38  
39

40 This study has other limitations. First, Nurture participants were not representative of the larger  
41 population in the southeastern US. We enrolled some women from an obstetric clinic that served  
42 a high percentage of low-income white women with high-risk pregnancies, but overall, our  
43 sample included a higher percentage of black women. Also, we experienced attrition from birth  
44 to the 12-month follow-up; approximately 29% of mothers and their infants withdrew or were  
45 lost to follow-up. This retention rate, however, is not unusual. In a similar birth cohort from the  
46 same geographic region, attrition at the 12-month follow-up exceeded 50%.[38] Moreover, this  
47  
48  
49  
50  
51  
52  
53  
54  
55  
56  
57  
58  
59  
60

1  
2  
3 study reports on findings up to 12 months of follow up for the Nurture cohort. However, a  
4 relatively large percent of children walk after 12 months of age.[24] Given the relatively short  
5 study period, we were not able to assess children who walked after the end of data collection.  
6  
7  
8  
9  
10

## 11 **Conclusions**

12 Preventing excessive weight gain in infancy is especially important, and the first year of life  
13 represents a critical window for intervention. Although rates of weight gain and obesity did not  
14 increase substantially in children ages 6 to 23 months from 1976 to 2014, there were significant  
15 increases among non-Hispanic black children.[39] Additionally, a recent study suggests that  
16 rapid weight gain in infancy may be more detrimental for black children compared to white  
17 children by the time they reach age 5 years.[40] Thus, it is a public health priority to better  
18 understand factors contributing to excess weight gain in infancy—especially among black  
19 children. Our study contributes to the growing body of evidence suggesting that delayed motor  
20 development may be associated with later obesity. Intervention efforts may be warranted to  
21 encourage movement and help facilitate gross motor development in young children.[41]  
22  
23  
24  
25  
26  
27  
28  
29  
30  
31  
32  
33  
34  
35  
36  
37  
38  
39

## 40 **List of abbreviations**

41 Interactive voice response (IVR); standard deviation (SD); United States (US); World Health  
42 Organization (WHO).  
43  
44  
45  
46  
47  
48

## 49 **Declarations**

50  
51 **Ethics approval and consent to participate:** Women provided written, informed consent for  
52 themselves and their infants to participate in the study. The Institutional Review Board of Duke  
53  
54  
55  
56  
57  
58  
59  
60



1  
2  
3 University Medical Center approved this study and its protocol (reference number  
4  
5 Pro00036242).  
6  
7  
8  
9

10 **Patient Consent for publication:** Not applicable.  
11  
12

13  
14 **Data sharing statement:** The datasets generated and analyzed for the current study are not  
15 publicly available due to human subject's restrictions at Duke University Medical Center but  
16 may available from the corresponding author on reasonable request with appropriate permissions  
17 and agreements in place.  
18  
19  
20  
21  
22  
23  
24  
25

26 **Competing interests:** The authors declare that they have no competing interests.  
27  
28  
29  
30

31 **Funding:** This study was supported by a grant from the National Institutes of Health  
32 (R01DK094841). The funders had no role in the design of the study, data collection and  
33 analysis, decision to publish, or preparation of the manuscript.  
34  
35  
36  
37  
38  
39

40 **Contributors:** AS conducted the analysis, drafted components of the manuscript, and approved  
41 the final manuscript. BN oversaw the analysis, reviewed and edited the manuscript, and  
42 approved the final manuscript. SEBN designed the study, conceived of the analysis, drafted  
43 components of the manuscript, and approved the final manuscript.  
44  
45  
46  
47  
48  
49  
50

51 **Acknowledgements:** Not applicable.  
52  
53  
54  
55  
56  
57  
58  
59  
60

## References

1. Kim J, Lee I, Lim S: **Overweight or obesity in children aged 0 to 6 and the risk of adult metabolic syndrome: A systematic review and meta-analysis.** *Journal of clinical nursing* 2017, **26**(23-24):3869-3880.
2. Lloyd LJ, Langley-Evans SC, McMullen S: **Childhood obesity and adult cardiovascular disease risk: a systematic review.** *International journal of obesity (2005)* 2010, **34**(1):18-28.
3. Perng W, Rifas-Shiman SL, Kramer MS, Haugaard LK, Oken E, Gillman MW, Belfort MB: **Early Weight Gain, Linear Growth, and Mid-Childhood Blood Pressure: A Prospective Study in Project Viva.** *Hypertension (Dallas, Tex : 1979)* 2016, **67**(2):301-308.
4. Gillman MW: **Early infancy as a critical period for development of obesity and related conditions.** *Nestle Nutrition workshop series Paediatric programme* 2010, **65**:13-20; discussion 20-14.
5. **Early childhood obesity prevention policies** [<http://www.iom.edu/Reports/2011/Early-Childhood-Obesity-Prevention-Policies.aspx>.]
6. Larson N, Ward DS, Neelon SB, Story M: **What role can child-care settings play in obesity prevention? A review of the evidence and call for research efforts.** *Journal of the American Dietetic Association* 2011, **111**(9):1343-1362.
7. **Let's Move! Child Care** [<https://letsmove.obamawhitehouse.archives.gov/child-care-providers>]
8. **Active start: A statement of physical activity guidelines for children from birth to age 5** [[www.shapeamerica.org/standards/guidelines/activestart.cfm](http://www.shapeamerica.org/standards/guidelines/activestart.cfm)]
9. American Academy of Pediatrics APHA, National Resource Center for Health and Safety in Child Care and Early Education: **Caring for Our Children: National Health and Safety Performance Standards; Guidelines for Early Care and Education Programs.** In., 3rd Ed edn. Elk Grove Village, IL: American Academy of Pediatrics; 2011.
10. Kakebeeke TH, Lanzi S, Zysset AE, Arhab A, Messerli-Burgy N, Stuelb K, Leeger-Aschmann CS, Schmutz EA, Meyer AH, Kriemler S *et al*: **Association between Body Composition and Motor Performance in Preschool Children.** *Obesity facts* 2017, **10**(5):420-431.
11. Graf C, Koch B, Kretschmann-Kandel E, Falkowski G, Christ H, Coburger S, Lehmacher W, Bjarnason-Wehrens B, Platen P, Tokarski W *et al*: **Correlation between BMI, leisure habits and motor abilities in childhood (CHILT-project).** *International journal of obesity and related metabolic disorders : journal of the International Association for the Study of Obesity* 2004, **28**(1):22-26.
12. Mond JM, Stich H, Hay PJ, Kraemer A, Baune BT: **Associations between obesity and developmental functioning in pre-school children: a population-based study.** *International journal of obesity (2005)* 2007, **31**(7):1068-1073.
13. Okely AD, Booth ML, Chey T: **Relationships between body composition and fundamental movement skills among children and adolescents.** *Research quarterly for exercise and sport* 2004, **75**(3):238-247.
14. Cawley J, Spiess CK: **Obesity and skill attainment in early childhood.** *Economics and human biology* 2008, **6**(3):388-397.
15. Benjamin Neelon SE, Oken E, Taveras EM, Rifas-Shiman SL, Gillman MW: **Age of achievement of gross motor milestones in infancy and adiposity at age 3 years.** *Maternal and child health journal* 2012, **16**(5):1015-1020.
16. Camargos ACR, Mendonca VA, Andrade CA, Oliveira KSC, Lacerda ACR: **Overweight and obese infants present lower cognitive and motor development scores than normal-weight peers.** *Research in developmental disabilities* 2016, **59**:410-416.

17. Shibli R, Rubin L, Akons H, Shaoul R: **Morbidity of overweight (>or=85th percentile) in the first 2 years of life.** *Pediatrics* 2008, **122**(2):267-272.
18. Slining M, Adair LS, Goldman BD, Borja JB, Bentley M: **Infant overweight is associated with delayed motor development.** *The Journal of pediatrics* 2010, **157**(1):20-25.e21.
19. **Relationship between physical growth and motor development in the WHO Child Growth Standards.** *Acta paediatrica (Oslo, Norway : 1992) Supplement* 2006, **450**:96-101.
20. Wells JC, Ritz P: **Physical activity at 9-12 months and fatness at 2 years of age.** *American journal of human biology : the official journal of the Human Biology Council* 2001, **13**(3):384-389.
21. Li R, O'Connor L, Buckley D, Specker B: **Relation of activity levels to body fat in infants 6 to 12 months of age.** *The Journal of pediatrics* 1995, **126**(3):353-357.
22. Benjamin Neelon SE, Ostbye T, Bennett GG, Kravitz RM, Clancy SM, Stroo M, Iversen E, Hoyo C: **Cohort profile for the Nurture Observational Study examining associations of multiple caregivers on infant growth in the Southeastern USA.** *BMJ open* 2017, **7**(2):e013939.
23. Bayley N: **Bayley scales of infant and toddler development: Bayley-III.** San Antonio, Texas, USA; Vol. 7. 2006.
24. **WHO Motor Development Study: windows of achievement for six gross motor development milestones.** *Acta paediatrica (Oslo, Norway : 1992) Supplement* 2006, **450**:86-95.
25. **WHO Child Growth Standards based on length/height, weight and age.** *Acta paediatrica (Oslo, Norway : 1992) Supplement* 2006, **450**:76-85.
26. Villar J, Altman DG, Purwar M, Noble JA, Knight HE, Ruyan P, Cheikh Ismail L, Barros FC, Lambert A, Papageorghiou AT *et al*: **The objectives, design and implementation of the INTERGROWTH-21st Project.** *BJOG : an international journal of obstetrics and gynaecology* 2013, **120 Suppl 2**:9-26, v.
27. Murray GK, Veijola J, Moilanen K, Miettunen J, Glahn DC, Cannon TD, Jones PB, Isohanni M: **Infant motor development is associated with adult cognitive categorisation in a longitudinal birth cohort study.** *Journal of child psychology and psychiatry, and allied disciplines* 2006, **47**(1):25-29.
28. Schmidt Morgen C, Andersen AM, Due P, Neelon SB, Gamborg M, Sorensen TI: **Timing of motor milestones achievement and development of overweight in childhood: a study within the Danish National Birth Cohort.** *Pediatric obesity* 2014, **9**(4):239-248.
29. Cairney J, Hay JA, Faught BE, Hawes R: **Developmental coordination disorder and overweight and obesity in children aged 9-14 y.** *International journal of obesity (2005)* 2005, **29**(4):369-372.
30. Zeng N, Ayyub M, Sun H, Wen X, Xiang P, Gao Z: **Effects of Physical Activity on Motor Skills and Cognitive Development in Early Childhood: A Systematic Review.** *BioMed research international* 2017, **2017**:2760716.
31. Fields DA, Krishnan S, Wisniewski AB: **Sex differences in body composition early in life.** *Gender medicine* 2009, **6**(2):369-375.
32. Eriksson B, Lof M, Forsum E: **Body composition in full-term healthy infants measured with air displacement plethysmography at 1 and 12 weeks of age.** *Acta paediatrica (Oslo, Norway : 1992)* 2010, **99**(4):563-568.
33. Taanila A, Murray GK, Jokelainen J, Isohanni M, Rantakallio P: **Infant developmental milestones: a 31-year follow-up.** *Developmental medicine and child neurology* 2005, **47**(9):581-586.
34. Murray GK, Jones PB, Kuh D, Richards M: **Infant developmental milestones and subsequent cognitive function.** *Annals of neurology* 2007, **62**(2):128-136.
35. Flensburg-Madsen T, Mortensen EL: **Infant developmental milestones and adult intelligence: A 34-year follow-up.** *Early human development* 2015, **91**(7):393-400.

- 1  
2  
3 36. Kuh D, Hardy R, Butterworth S, Okell L, Richards M, Wadsworth M, Cooper C, Sayer AA: **Developmental origins of midlife physical performance: evidence from a British birth cohort.** *American journal of epidemiology* 2006, **164**(2):110-121.
- 4  
5  
6 37. Kuh D, Hardy R, Butterworth S, Okell L, Wadsworth M, Cooper C, Aihie Sayer A: **Developmental origins of midlife grip strength: findings from a birth cohort study.** *The journals of gerontology Series A, Biological sciences and medical sciences* 2006, **61**(7):702-706.
- 7  
8  
9 38. Fuemmeler BF, Lee CT, Soubry A, Iversen ES, Huang Z, Murtha AP, Schildkraut JM, Jirtle RL, Murphy SK, Hoyo C: **DNA Methylation of Regulatory Regions of Imprinted Genes at Birth and Its Relation to Infant Temperament.** *Genetics & epigenetics* 2016, **8**:59-67.
- 10  
11  
12 39. Akinbami LJ, Kit BK, Carroll MD, Fakhouri THI, Ogden CL: **Trends in Anthropometric Measures Among US Children 6 to 23 Months, 1976-2014.** *Pediatrics* 2017, **139**(3).
- 13  
14  
15 40. Hawkins SS, Rifas-Shiman SL, Gillman MW, Taveras EM: **Racial differences in crossing major growth percentiles in infancy.** *Archives of disease in childhood* 2017.
- 16  
17  
18 41. Han A, Fu A, Cobley S, Sanders RH: **Effectiveness of exercise intervention on improving fundamental movement skills and motor coordination in overweight/obese children and adolescents: A systematic review.** *Journal of science and medicine in sport* 2018, **21**(1):89-102.
- 19  
20  
21  
22  
23

## 24 Figures

25  
26 Figure 1: Mean trajectories of motor development score (a) and weight-for-length z-score (b)  
27  
28 throughout infancy  
29  
30  
31  
32

## 33 Tables

34  
35 **Table 1. Characteristics of mothers and infants participating in the Nurture study (n=433)**  
36  
37

| 38 Infant Characteristics                         | 39 Mean (SD)               |
|---------------------------------------------------|----------------------------|
| 40 Birth weight for gestational age z-score       | 41 -0.3 (1.0)              |
| 42 Age at 12-month home visit, days               | 43 373.9 (23.6)            |
| 44 Weight-for-length z-score at 12 months         | 45 0.6 (1.0)               |
| 46 Any breastfeeding, weeks                       | 47 17.6 (19.7)             |
| 48 Motor development composite score at 12 months | 49 97.9 (10.7)             |
| 50                                                | 51 <b>Percent (number)</b> |
| 52 Gender, female                                 | 53 50.6 (219)              |

54  
55  
56  
57  
58  
59  
60

|                                                  |                  |
|--------------------------------------------------|------------------|
| Race                                             |                  |
| Black                                            | 64.7 (280)       |
| White                                            | 18.5 (80)        |
| Other race/more than one race                    | 16.9 (73)        |
| Ethnicity, Latino/a                              | 9.0 (37)         |
| <b>Age of rolling over</b>                       |                  |
| 4 months and younger                             | 72.1 (312)       |
| Older than 4 months                              | 27.9 (121)       |
| <b>Age of sitting up</b>                         |                  |
| 5 months and younger                             | 44.3 (192)       |
| 5-6 months                                       | 33.0 (143)       |
| Older than 6                                     | 22.6 (98)        |
| <b>Age of crawling</b>                           |                  |
| 6 months and younger                             | 19.9 (86)        |
| 7-8 months                                       | 40.4 (175)       |
| Older than 8 months                              | 39.7 (172)       |
| <b>Age of walking</b>                            |                  |
| 11 months and younger                            | 34.7 (150)       |
| 12 months                                        | 28.9 (125)       |
| Older than 12                                    | 36.3 (157)       |
| <b>Maternal Characteristics</b>                  | <b>Mean (SD)</b> |
| Age, years                                       | 28.1 (5.8)       |
| Pre-pregnancy body mass index, kg/m <sup>2</sup> | 30.6 (9.3)       |

|                                                    | <i>Percent (frequency)</i> |
|----------------------------------------------------|----------------------------|
| Race                                               |                            |
| Black                                              | 67.4 (292)                 |
| White                                              | 22.2 (96)                  |
| Other race/more than one race                      | 10.4 (45)                  |
| Ethnicity, Latina                                  | 5.6 (24)                   |
| Education                                          |                            |
| ≤High school graduate                              | 44.1 (191)                 |
| Some college, college graduate, or graduate degree | 55.9 (242)                 |
| Marital status                                     |                            |
| Married or living with partner                     | 59.1 (253)                 |
| Never married, divorced, separated, other          | 40.9 (175)                 |
| <b>Household Characteristics</b>                   | <i>Percent (frequency)</i> |
| Annual household income                            |                            |
| < \$20,000                                         | 38.3 (166)                 |
| ≥ \$20,000                                         | 61.7 (267)                 |

**Table 2. Adjusted<sup>a</sup> longitudinal regression estimates and 95% confidence intervals (CI) in analyses examining motor development score and subsequent weight-for-length z-score from 3 to 12 months**

| Motor development score | Infant weight-for-length z-score |        |        |         |
|-------------------------|----------------------------------|--------|--------|---------|
|                         | Estimate                         | 95% CI |        | p-value |
| All infants (n=425)     | -0.004                           | -0.007 | -0.001 | 0.03    |

|                                      |        |        |        |      |
|--------------------------------------|--------|--------|--------|------|
| Male infants only (n=213)            | -0.007 | -0.01  | -0.001 | 0.03 |
| Female infants only (n=211)          | 0.001  | -0.005 | 0.008  | 0.62 |
| <b>Gross motor development score</b> |        |        |        |      |
| All infants (n=425)                  | -0.018 | -0.031 | -0.004 | 0.01 |
| Male infants only (n=213)            | -0.033 | -0.064 | -0.003 | 0.03 |
| Female infants only (n=211)          | 0.005  | -0.024 | 0.034  | 0.74 |

<sup>a</sup>Adjusted for maternal pre-pregnancy body mass index, age, and education; household income; infant race, gender, birth weight for gestational age z-score, breastfeeding, and motor development score at previous visit.

**Table 3. Adjusted<sup>a</sup> longitudinal regression estimates and 95% confidence intervals (CI) in analyses examining motor milestone achievement and subsequent weight-for-length z-score from 3 to 12 months**

| Age of motor milestone achievement     | Estimate | 95% CI |       | p-value |
|----------------------------------------|----------|--------|-------|---------|
| <b>All infants (n=425)</b>             |          |        |       |         |
| Rolling over (ref=older than 4 months) |          |        |       |         |
| 4 months or younger                    | -0.19    | -0.40  | 0.008 | 0.06    |
| Sitting up (ref=older than 6 months)   |          |        |       |         |
| 5 months or younger                    | 0.19     | -0.06  | 0.43  | 0.13    |
| 5 to 6 months                          | 0.22     | -0.03  | 0.48  | 0.09    |
| Crawling (ref=9 months and older)      |          |        |       |         |
| 6 months or younger                    | -0.34    | -0.59  | -0.09 | 0.008   |
| 7 to 8 months                          | 0.01     | -0.20  | 0.21  | 0.94    |

|                                        |       |       |       |      |
|----------------------------------------|-------|-------|-------|------|
| Walking (ref=older than 12 months)     |       |       |       |      |
| 11 months and younger                  | -0.17 | -0.39 | 0.06  | 0.14 |
| 12 months                              | 0.13  | -0.10 | 0.37  | 0.27 |
| <b>Male infants only (n=208)</b>       |       |       |       |      |
| Rolling over (ref=older than 4 months) |       |       |       |      |
| 4 months or younger                    | -0.29 | -0.60 | 0.02  | 0.06 |
| Sitting up (ref=older than 6 months)   |       |       |       |      |
| 5 months or younger                    | 0.18  | -0.17 | 0.54  | 0.31 |
| 5 to 6 months                          | 0.27  | -0.10 | 0.64  | 0.15 |
| Crawling (ref=9 months and older)      |       |       |       |      |
| 6 months or younger                    | -0.46 | -0.83 | -0.10 | 0.01 |
| 7 to 8 months                          | -0.06 | -0.37 | 0.25  | 0.91 |
| Walking (ref=older than 12 months)     |       |       |       |      |
| 11 months and younger                  | -0.09 | -0.44 | 0.26  | 0.63 |
| 12 months                              | 0.08  | -0.28 | 0.44  | 0.66 |
| <b>Female infants only (n=217)</b>     |       |       |       |      |
| Rolling over (ref=older than 4 months) |       |       |       |      |
| 4 months or younger                    | -0.12 | -0.40 | 0.16  | 0.39 |
| Sitting up (ref=older than 6 months)   |       |       |       |      |
| 5 months or younger                    | 0.18  | -0.16 | 0.52  | 0.30 |
| 5 to 6 months                          | 0.16  | -0.20 | 0.53  | 0.37 |
| Crawling (ref=9 months and older)      |       |       |       |      |
| 6 months or younger                    | -0.27 | -0.63 | 0.08  | 0.13 |



|                                    |       |       |      |      |
|------------------------------------|-------|-------|------|------|
| 7 to 8 months                      | 0.05  | -0.24 | 0.33 | 0.75 |
| Walking (ref=older than 12 months) |       |       |      |      |
| 11 months and younger              | -0.25 | -0.56 | 0.05 | 0.10 |
| 12 months                          | 0.20  | -0.14 | 0.54 | 0.24 |

<sup>a</sup>Adjusted for maternal pre-pregnancy body mass index, age, and education; household income;

infant race, gender, birth weight for gestational age z-score, and breastfeeding.

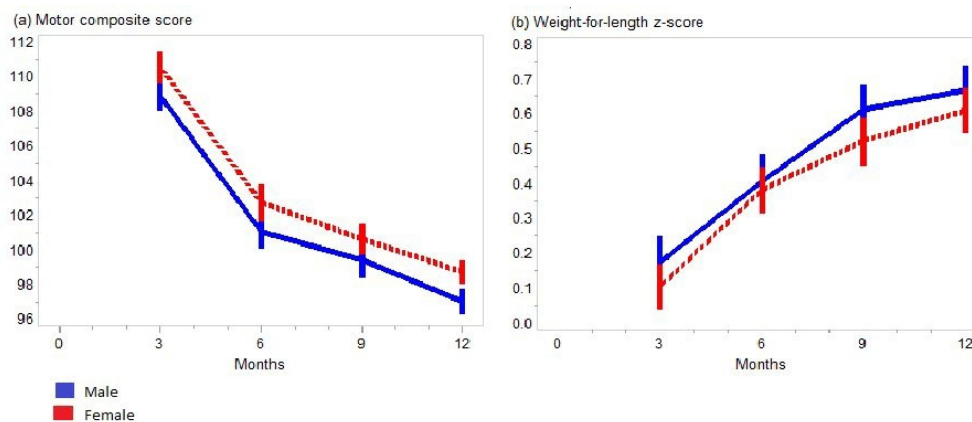

Figure 1: Mean trajectories of motor development score (a) and weight-for-length z-score (b) throughout infancy

76x33mm (300 x 300 DPI)

# BMJ Open

## Longitudinal associations of gross motor development, motor milestone achievement, and weight-for-length z-score in a racially diverse cohort of US infants

|                                 |                                                                                                                                                                                                                                                                                                   |
|---------------------------------|---------------------------------------------------------------------------------------------------------------------------------------------------------------------------------------------------------------------------------------------------------------------------------------------------|
| Journal:                        | <i>BMJ Open</i>                                                                                                                                                                                                                                                                                   |
| Manuscript ID                   | bmjopen-2018-024440.R1                                                                                                                                                                                                                                                                            |
| Article Type:                   | Research                                                                                                                                                                                                                                                                                          |
| Date Submitted by the Author:   | 07-Aug-2018                                                                                                                                                                                                                                                                                       |
| Complete List of Authors:       | Shoaibi, Azza; Medical University of South Carolina - College of Medicine, Public Health Sciences<br>Neelon, Brian; The Medical University of South Carolina, Biostats<br>Ostbye, Truls; Duke University<br>Benjamin-Neelon, Sara E.; Johns Hopkins University, Bloomberg School of Public Health |
| <b>Primary Subject Heading</b>: | Paediatrics                                                                                                                                                                                                                                                                                       |
| Secondary Subject Heading:      | Nutrition and metabolism                                                                                                                                                                                                                                                                          |
| Keywords:                       | Developmental milestones, Gross motor, Infant, Motor milestones, Obesity                                                                                                                                                                                                                          |
|                                 |                                                                                                                                                                                                                                                                                                   |

SCHOLARONE™  
Manuscripts

1  
2  
3 **Longitudinal associations of gross motor development, motor milestone achievement, and**  
4 **weight-for-length z-score in a racially diverse cohort of US infants**  
5

6  
7 Azza Shoaibi, PhD,<sup>1</sup> Brian Neelon, PhD,<sup>1</sup> Truls Østbye, MD, PhD,<sup>2</sup> Sara E Benjamin-Neelon,  
8  
9 PhD, JD.<sup>3</sup>  
10  
11  
12  
13

14  
15 <sup>1</sup>Department of Public Health Sciences, Medical University of South Carolina, Charleston, South  
16 Carolina 29425; <sup>2</sup>Department of Community and Family Medicine, Duke University Medical  
17 Center, Durham, North Carolina 27705; <sup>3</sup>Department of Health, Behavior and Society, Johns  
18 Hopkins Bloomberg School of Public Health, Baltimore, Maryland 21205.  
19  
20  
21  
22  
23

24  
25  
26 **Email addresses:** shoaibi@musc.edu; neelon@musc.edu; truls.ostbye@duke.edu;  
27  
28 sara.neelon@jhu.edu.  
29  
30

31  
32  
33 **Address correspondence to:**  
34

35 Azza Shoaibi PhD,  
36  
37 Post doctorate fellow  
38  
39 Department of Public Health Sciences, Biomedical Informatics Center  
40  
41 Medical University of South Carolina,  
42  
43 135 cannon, Charleston, South Carolina 29425 USA  
44  
45 [shoaibi@musc.edu](mailto:shoaibi@musc.edu). Tel: 803-201-7303  
46  
47  
48  
49  
50

51 Word count: 3009  
52  
53  
54  
55  
56  
57  
58  
59  
60

## Abstract

**Objectives:** To investigate longitudinal associations between gross motor development, motor milestone achievement, and weight-for-length z-scores in a sample of infants. In a secondary aim, we explored potential bidirectional relationships, as higher weight-for-length z-scores may impede motor development and poor motor development may lead to obesity.

**Design:** The design was an observational birth cohort.

**Setting:** We used data from the Nurture study, a birth cohort of predominately black women and their infants residing in the southeastern United States.

**Participants:** 666 women enrolled their infants in Nurture. We excluded infants with missing data on exposure, outcome, or main covariates, leaving a total analytic sample of 425 infants.

**Primary outcome:** The outcome was weight-for-length z-score, measured when infants were 3, 6, 9, and 12 months.

**Results:** Among infants, 64.7% were black, 18.8% were white, and 16.9% were other/multiple race. Mean (SD) breastfeeding duration was 17.6 (19.7) weeks. Just over one-third (38.5%) had an annual household income of < \$20,000. After adjusting for potential confounders, higher motor development score was associated with lower weight-for-length z-score (-0.004; 95% CI -0.001, -0.007; p=0.01), mainly driven by associations among males (-0.007; 95% CI -0.014, -0.001; p=0.03) and not females (0.001; 95% CI -0.005, 0.008; p=0.62). Earlier crawling was the only milestone associated with a lower weight-for-length z-score at 12 months (-0.328; 95% CI -0.585, 0.072; p=0.012). However, this association appeared to be driven by male infants only (-0.461; 95% CI -0.825--0.096; p=0.01). Weight-for-length z-score was unrelated to subsequent motor development score and was thus not bidirectional in our sample.

1  
2  
3 **Conclusions:** Higher motor development score and earlier crawling were associated with lower  
4  
5 subsequent weight-for-length z-score. However, this was primary true for male infants only.  
6  
7 These findings contribute to the growing body of evidence suggesting that delayed motor  
8  
9 development may be associated with later obesity.  
10  
11  
12  
13  
14

15 **Strengths and limitations of this study:**

- 16  
17 • This study includes multiple prospective measures of motor development and weight-for-  
18  
19 length z-scores, which allowed for careful assessment of the temporality of the  
20  
21 relationship between the two.  
22  
23  
24 • Previous studies have not included sufficient representation of participants from racial  
25  
26 minority groups. This cohort consists of predominately black women and infants.  
27  
28  
29 • We were not able to follow infants in the Nurture sample beyond 12 months of age.  
30  
31  
32 • Nurture participants were not representative of the larger population in the southeastern  
33  
34 US.  
35  
36 • We experienced attrition from birth to the 12-month follow-up; approximately 29% of  
37  
38 mothers and their infants withdrew or were lost to follow-up.  
39  
40  
41  
42

43 **Key words:** Developmental milestones; Gross motor; Infant; Motor milestones; Obesity.  
44  
45  
46  
47  
48  
49  
50  
51  
52  
53  
54  
55  
56  
57  
58  
59  
60

## Background

Early childhood is a critical period for preventing obesity and its related complications.[1-3] Identifying early predictors of excessive weight gain can help inform effective interventions to prevent later obesity.[4] As a result, recent calls to action highlight the importance of promoting gross motor activity and decreasing sedentary time for very young children.[5-9] While there is evidence of an association between gross motor activity and obesity in early childhood,[10-18] findings from previous studies have not been consistent—perhaps due to bidirectional relationships among these variables.

Some studies have shown that excess adiposity may impede movement and compromise motor development.[16-18] In one study, obesity and excess subcutaneous fat were associated with delayed motor development, but motor development was unrelated to subsequent weight status.[18] Another study found that heavier infants sat up without support earlier, but weight status was largely unrelated to other motor milestones.[19]

Other studies suggest that physical activity and gross motor skills may provide opportunities to expend energy and may help prevent obesity.[20, 21] Earlier attainment of gross motor milestones, such as crawling and walking, may provide opportunities for infants to move regularly, increasing movement and thus energy expenditure.[15] Given the conflicting findings and the potential complexity of the relationship, we investigated longitudinal associations between gross motor development and weight-for-length, and explored potential bidirectional relationships, in a sample of racially diverse infants.

## Methods

### Study design and population

We used data from the Nurture study, a birth cohort of predominately black women and their infants residing in the southeastern United States (US).[22] The overall goal of Nurture is to identify factors related to feeding, physical activity, sleep, and stress that contribute to excessive weight gain in infancy, focusing on the role of various caregivers. Between 2013 and 2015, we enrolled women in the study in later pregnancy and confirmed participations shortly after birth. Women provided written, informed consent for themselves and their infants to participate in the study. The Institutional Review Board of Duke University Medical Center approved this study and its protocol.

Trained data collectors conducted home visits when infants were 3, 6, 9, and 12 months of age. In addition, women received automated interactive voice response (IVR) telephone calls in months 1, 2, 4, 5, 7, 8, 10 and 11 to assess a limited set of behaviors, including infant motor milestone achievement. Of the 666 women who enrolled their infants in Nurture after birth, 535 (80.3%) completed the 3-month home visit, 497 (74.6%) completed the 6-month visit, 457 (68.6%) completed the 9-month visit, and 468 (70.3%) completed the 12-month visit. For the present study, we excluded infants with missing data on weight-for-length z-scores at 12 months (n=35) leaving 433 infants. We further excluded those with missing information on covariates included in all models *a priori* and those with missing motor development scores or values outside the World Health Organization (WHO) windows for motor milestone of achievement (n=8), leaving a total analysis sample of 425 infants.



1  
2  
3 We conducted two distinct sets of analyses. First, we examined associations between motor  
4 development measured using the Bayley Scales of Infant and Toddler Development: Third  
5 Edition[23] and weight-for-length z-score. We hypothesized that poor motor development  
6  
7  
8 would be associated with higher weight-for-length z-scores longitudinally throughout infancy.  
9  
10  
11  
12 Second, we examined associations of gross motor milestone achievement (rolling over, sitting  
13  
14  
15 up, crawling, and walking) and weight-for-length z-score. We hypothesized that delayed  
16  
17  
18 achievement of motor milestones would be associated with higher weight for length z-score at 12  
19  
20  
21  
22  
23  
24 months.

#### 24 **Exposure: Motor development and motor milestones**

25  
26 We used two measures to define motor development. First, we used the Bayley Scales of Infant  
27  
28  
29 and Toddler Development: Third Edition to measure motor development of infants at each home  
30  
31  
32 visit at 3, 6, 9, and 12 months. This is an individually-administrated test that has been designed  
33  
34  
35 to assess children development in 5 different functional areas: fine motor, gross motor,  
36  
37  
38 cognition, language, social emotion, and adaptive. For this study, we used the motor composite  
39  
40  
41 score—the sum of the fine and gross motor scores. The fine motor score is comprised of 66  
42  
43  
44 items, which assess fine perceptual-motor integration, motor planning and speed, visual tracking,  
45  
46  
47 reaching, object grasping, object manipulation, functional hand skills, and responses to tactile  
48  
49  
50 information. The gross motor score is comprised of 72 items, which asses the movement of  
51  
52  
53 limbs and torso, static positions, dynamic movement balance and motor planning. The  
54  
55  
56 descriptive classification of Bayley Scales of Infant and Toddler Development includes 7 ordinal  
57  
58  
59 categories: extremely low score (composite score of 69 and below), borderline (composite score  
60  
of 70 to 79), low average (composite score of 80-89), average (composite score of 90 to 109),

1  
2  
3 high average (composite score of 110 to 119), superior (composite score of 120 to 129), and very  
4  
5 superior (composite score of 130 and above). To allow our results to be comparable with  
6  
7 previous studies,[16, 18] we used the sum of the fine and gross motor scores for the first  
8  
9 analysis. However, we also examined the scaled gross motor development score only, as we  
10  
11 were most interested in motor development as a marker of physical activity.  
12  
13  
14  
15

16  
17 Second, mothers reported whether their infants had achieved each of 4 gross motor milestones  
18  
19 monthly during the IVR call: rolling over without assistance, sitting up without assistance,  
20  
21 crawling using all 4 limbs, and walking without assistance. Consistent with our previous study  
22  
23 [24] and based on the WHO windows for motor milestone achievement[15], we categorized age  
24  
25 of achievement into 3 groups. We collapsed groups that contained fewer than 25 infants. Infants  
26  
27 who were not able to achieve a particular milestone by the end of the study period were included  
28  
29 in the oldest possible age category.  
30  
31  
32  
33  
34

### 35 **Outcome: Weight-for-length z-score**

36  
37 Trained data collectors measured infant weight and length at each home visit—recumbent length  
38  
39 to the nearest 1/8th inch and weight to the nearest 0.1 pound in triplicate. We then used the  
40  
41 average of the three measures. We calculated age- and sex-specific weight-for-length z-scores  
42  
43 using WHO reference standards.[25]  
44  
45  
46  
47  
48

### 49 **Other measures**

50  
51 We collected demographic information from mothers via interviews and questionnaires at  
52  
53 recruitment, at birth, during IVR calls, and during each home visit. Infant variables of interest  
54  
55  
56  
57  
58  
59  
60

1  
2  
3 included age, gender, birth weight for gestational age z-score, and race (black, white, other). We  
4  
5 abstracted information on infant birth weight in grams and length in centimeters from the  
6  
7 medical record. We calculated birth weight for gestational age z-score using international  
8  
9 reference data put forth by Intergrowth-21st Newborn Birth Weight Standards and Z Scores.[26]  
10  
11 Maternal variables of interest included age, education ( $\leq$ high school graduate, some college,  
12  
13 college graduate, or graduate degree), household income ( $<$ \$20,000,  $\geq$ \$20,000), and pre-  
14  
15 pregnancy body mass index (BMI). We also documented breastfeeding status during each IVR  
16  
17 call and calculated the total number of months of any breastfeeding for each infant.  
18  
19  
20  
21  
22  
23

### 24 **Statistical analysis**

25  
26 We calculated means and standard deviations (SD) for continuous demographic variables and  
27  
28 percentages for categorical variables. We explored mean trajectories of both motor development  
29  
30 score and weight-for-length z-score at 3, 6, 9, and 12 months for male and female infants,  
31  
32 separately. In the first analysis, we examined the association between motor development score  
33  
34 and weight-for-length z-score at a subsequent visit using lagged repeated-measures linear  
35  
36 regression. A first-order autoregressive covariance structure to account for association between  
37  
38 the repeated measures among infants. We included all covariates discussed above in the model.  
39  
40 We also ran the same model to examine the association between gross motor development score  
41  
42 only and subsequent weight-for-length z-score. Additionally, as some studies have suggested a  
43  
44 bidirectional association between motor development and weight status, we investigated the  
45  
46 effect of weight-for-length z-score at an earlier visit on motor development score at a given  
47  
48 current visit. For example, when predicting weight-for-length z-score at the 6-month visit, we  
49  
50 used motor development score at the 3-month visit. We took this approach to ensure that the  
51  
52  
53  
54  
55  
56  
57  
58  
59  
60

1  
2  
3 exposure preceded the outcome.  
4  
5  
6  
7

8 In the second analysis, we used separate linear regressions to investigate the association between  
9  
10 age at achievement of each of the 4 milestones and weight-for-length z-score at 12 months. We  
11  
12 included the same covariates of interest in the models. To explore differences by gender, we ran  
13  
14 the same models separately among female and males. We present results in terms of parameter  
15  
16 estimates, 95% CI, and two-sided p values. We conducted all analyses using SAS 9.4 (SAS  
17  
18 Institute, Cary, North Carolina, USA) at a significance level of  $<0.05$ .  
19  
20  
21  
22  
23

#### 24 **Patient and Public Involvement**

25  
26 Research participants were not involved in the development, recruitment, or conduct of the  
27  
28 study. We will disseminate results of the study through scientific publications and mailings to  
29  
30 research participants.  
31  
32  
33  
34

#### 35 **Results**

36  
37 Among infants, 50.6% were female and 49.4% were male (Table 1). The mean (SD) birth  
38  
39 weight for gestational age z-score was -0.3 (1.0). In terms of race, 64.7% of infants were black,  
40  
41 18.8% were white, and 16.9% were of 'other' race. The mean (SD) breastfeeding duration was  
42  
43 17.6 (19.7) weeks. Among mothers, 44.1% had some college, college graduate, or graduate  
44  
45 degree, and 55.9 % were married or living with partner. Just over one-third (38.5%) had an  
46  
47 annual household income of less than \$20,000. Mothers had a mean (SD) pre-pregnancy BMI of  
48  
49 30.6 (9.4) and age of 28.13 (5.1) years. At 12 months, 66.5% of infants were normal weight and  
50  
51 over one third were considered at risk of overweight, overweight, or obese.  
52  
53  
54  
55  
56  
57  
58  
59  
60

[INSERT TABLE 1 HERE]

Figure 1 illustrates the mean (SD) of motor development scores and weight-for-length z-scores over time among males and females, separately. As Figure 1 (a) shows, motor development scores decreased slightly over infancy, with a mean of 109.7 (11.9) at birth and 97.9 (10.7) at 12 months. Figure 1 (b) shows an increasing trend for weight-for-length z-scores, indicating that infants got relatively heavier throughout the assessment period. In this sample, the mean weight-for-length z-score was 0.1 (1.0) at birth and increased to 0.6 (1.0) at 12 months. There was no evidence of outlying observations when we examined the scaled residuals from the final model.[27]

[INSERT FIGURE 1 HERE]

After adjusting for potential confounders, higher motor development score was associated with lower weight-for-length z-score (-0.004; 95% CI -0.001, -0.007; p=0.01) (Table 2). For every 10-unit increase in motor development score (measured at a previous visit), weight-for-length z-score decreased by 0.04 on average. In the stratified analysis, higher motor development score was associated with lower weight-for-length z-score (at the subsequent assessment) among males (-0.007; 95% CI -0.01, -0.001; p=0.03) but not females (0.001; 95% CI -0.005, 0.008; p=0.62). Similarly, when we examined gross motor score only, higher motor development score was associated with lower weight-for-length z-score (-0.02; 95% CI -0.03, -0.004; p=0.01). This association appeared driven by male infants only (-0.03; 95% CI -0.06, -0.003; p=0.03).

[INSERT TABLE 2 HERE]

Earlier achievement of rolling over, sitting up, and walking were not associated with weight-for-length z-score at 12 months (Table 3). However, earlier crawling was associated with lower weight-for-length z-score at 12 months: infants who crawled at 6 months or younger had an average z-score 0.33 lower than those who crawled at 9 months or older (-0.33; 95% CI -0.59, 0.07; p=0.01). In stratified analyses, we observed this association in male infants only (-0.46; 95% CI -0.83, -0.10; P=0.01). Finally, weight-for-length z-score was unrelated to subsequent motor development score (0.07; 95% CI -0.81, 0.96; P=0.87), and thus the association appears to be primarily from motor development to weight status rather than vice versa.

[INSERT TABLE 3 HERE]

## Discussion

Among this sample of racially diverse infants, we found that higher motor development score was associated with lower subsequent weight-for-length z-score. We also found that earlier crawling was associated with lower weight-for-length z-score at 12 months. However, earlier achievement of the other 3 gross motor milestones was not associated weight-for-length z-score at 12 months. Multiple studies found that delayed or poor motor development was associated with excessive weight among infants and young children,[15] although a few found no association.[18, 28] There are some differences in these studies in the timing and the method of assessing both motor development and obesity. For example, a study of 25,148 children in

1  
2  
3 Denmark showed that later achievement of motor milestones (sitting up and walking) was not  
4 associated with overweight at age 7 years, and later achievement of motor milestones was not a  
5 substantial risk factor for later increasing BMI.[29] Infant motor milestone achievement was  
6 reported retrospectively by mothers in this study. Nevertheless, their results support our finding  
7 that sitting up and walking were not associated with later weight. However, another study  
8 reported significant associations of age of achievement of rolling over, sitting up, and walking  
9 but not crawling with adiposity at age 3 years. Motor milestone achievement was also reported  
10 retrospectively by mothers. Also relevant to our study, Slining et al.[18] found that overweight  
11 infants were more likely to have concurrent delayed motor development among a sample of low-  
12 income African-American infants. However, in contrast to our findings, motor development was  
13 unrelated to subsequent anthropometry. We used Bayley Scales of Infant and Toddler  
14 Development: Third Edition[23] (the composite motor score) to measure motor development of  
15 infant while Slining et al. used the second edition of the same scale. This might explain some of  
16 the differences in the findings. To test the sensitivity of our findings to the measure of exposure,  
17 we performed the analysis using the gross motor development score only and found similar  
18 results.

19  
20  
21  
22  
23  
24  
25  
26  
27  
28  
29  
30  
31  
32  
33  
34  
35  
36  
37  
38  
39  
40  
41  
42 We also observed clear differences by gender. Higher motor development score was associated  
43 with lower weight-for-length z-score among males but not females in our sample of infants.  
44  
45 Additionally, among males only, earlier crawling was associated with lower weight-for-length z-  
46 score at 12 months. Previous studies examining this research question did not present  
47 differences by gender.[18, 29] However, in studies of older children, and consistent with our  
48 findings, researchers observed differences in motor development among boys only.[12, 14, 30]  
49  
50  
51  
52  
53  
54  
55  
56  
57  
58  
59  
60

1  
2  
3 In these prior studies, obesity in boys was associated with poorer gross motor performance. As a  
4 possible explanation, the researchers suggest that society may put greater pressure on boys to  
5 participate in physical activity from a young age—boys who opt out of these activities may not  
6 have the same opportunity to fully develop their motor skills.[12, 30] The researchers  
7 hypothesize that gender-specific associations between obesity and motor development  
8 impairment may be evident in even younger children, and suggest further research. A recent  
9 systematic review in children ages 4 to 6 years notes a positive relation between physical activity  
10 and motor milestone achievement, which could help explain the association.[31] Parental  
11 support of physical activity may also play a role in motor development differences between boys  
12 and girls. In a longitudinal study among 12-year-old children [32], girls reported less parental  
13 support of physical activity when compared to boys. Findings from the same study suggested  
14 that higher levels of parental support were translated to higher levels of physical activity in boys  
15 but not girls. These differences may be evident even earlier in childhood, although evidence is  
16 lacking.

17  
18  
19 Another explanation could be physiological differences in body composition between males and  
20 females in infancy. There is some evidence that very young male and female infants show  
21 differences in body fat and fat-free mass percentages, with girls having more fat mass at one  
22 month of age.[33] However, these differences by gender were no longer evident by 6  
23 months.[33] Other studies have essentially found no differences in infant percent body fat by  
24 gender.[34] We consistently observed associations between motor development and weight-for-  
25 length z-score in male infants only and agree that this finding warrants further exploration.



1  
2  
3 Breastfeeding may also influence the relationship between obesity and motor development in  
4  
5 infancy. Some evidence suggests improved motor development in breastfed infants and  
6  
7 toddlers [35], but findings have not been consistent across multiple studies. [36] In our study,  
8  
9 28.51% of infants were breastfed at 6 months of age, which is lower than the national prevalence  
10  
11 of 57.6%. [37] Further research is needed to investigate the exact role of breastfeeding on the  
12  
13 relationship between early obesity and motor development. In our study, we controlled for  
14  
15 breastfeeding in the final model.  
16  
17  
18  
19  
20

21  
22 Regardless, motor development in infancy may influence a number of behaviors and outcomes in  
23  
24 later childhood. Prior studies suggest that earlier attainment was associated with educational  
25  
26 achievement,[38] intelligence,[39, 40] and executive function[28] in later life. Moreover, motor  
27  
28 milestone achievement within normal windows during infancy was associated with better  
29  
30 physical performance[41] and greater grip strength[42] in middle adulthood. Unfortunately, we  
31  
32 were not able to follow infants in the Nurture sample beyond 12 months of age. Future studies  
33  
34 may consider longer follow-up periods to more fully assess outcomes throughout childhood.  
35  
36  
37  
38  
39

40  
41 This study has other limitations. First, Nurture participants were not representative of the larger  
42  
43 population in the southeastern US. We enrolled some women from an obstetric clinic that served  
44  
45 a high percentage of low-income white women with high-risk pregnancies, but overall, our  
46  
47 sample included a higher percentage of black women. Also, we experienced attrition from birth  
48  
49 to the 12-month follow-up; approximately 29% of mothers and their infants withdrew or were  
50  
51 lost to follow-up. This retention rate, however, is not unusual. In a similar birth cohort from the  
52  
53 same geographic region, attrition at the 12-month follow-up exceeded 50%.[43] Moreover, this  
54  
55  
56  
57  
58  
59  
60

1  
2  
3 study reports on findings up to 12 months of follow up for the Nurture cohort. However, a  
4 relatively large percent of children walk after 12 months of age.[24] Given the relatively short  
5 study period, we were not able to assess children who walked after the end of data collection.  
6  
7  
8  
9  
10

## 11 **Conclusions**

12 Preventing excessive weight gain in infancy is especially important, and the first year of life  
13 represents a critical window for intervention. Although rates of weight gain and obesity did not  
14 increase substantially in children ages 6 to 23 months from 1976 to 2014, there were significant  
15 increases among non-Hispanic black children.[44] Additionally, a recent study suggests that  
16 rapid weight gain in infancy may be more detrimental for black children compared to white  
17 children by the time they reach age 5 years.[45] Thus, it is a public health priority to better  
18 understand factors contributing to excess weight gain in infancy—especially among black  
19 children. Our study contributes to the growing body of evidence suggesting that delayed motor  
20 development may be associated with higher weight-for-length z-scores in the future.  
21  
22  
23  
24  
25  
26  
27  
28  
29  
30  
31  
32

33 Intervention efforts may be warranted to encourage movement and help facilitate gross motor  
34 development in young children.[46]  
35  
36  
37  
38  
39  
40  
41  
42

## 43 **List of abbreviations**

44 Interactive voice response (IVR); standard deviation (SD); United States (US); World Health  
45 Organization (WHO).  
46  
47  
48  
49  
50

## 51 **Declarations**

1  
2  
3 **Ethics approval and consent to participate:** Women provided written, informed consent for  
4 themselves and their infants to participate in the study. The Institutional Review Board of Duke  
5 University Medical Center approved this study and its protocol (reference number  
6 Pro00036242).  
7  
8  
9  
10  
11  
12  
13

14 **Patient Consent for publication:** Not applicable.  
15  
16  
17  
18

19 **Data sharing statement:** The datasets generated and analyzed for the current study are not  
20 publicly available due to human subject restrictions at Duke University Medical Center but may  
21 available from the corresponding author on reasonable request with appropriate permissions and  
22 agreements in place.  
23  
24  
25  
26  
27  
28  
29

30 **Competing interests:** The authors declare that they have no competing interests.  
31  
32  
33  
34

35 **Funding:** This study was supported by a grant from the National Institutes of Health  
36 (R01DK094841). The funders had no role in the design of the study, data collection and  
37 analysis, decision to publish, or preparation of the manuscript.  
38  
39  
40  
41  
42  
43

44 **Contributors:** AS conducted the analysis, drafted components of the manuscript, and approved  
45 the final manuscript. BN oversaw the analysis, reviewed and edited the manuscript, and  
46 approved the final manuscript. SEBN designed the study, conceived of the analysis, drafted  
47 components of the manuscript, and approved the final manuscript. TØ contributed to the design  
48 of the study, reviewed and edited the manuscript, and approved the final manuscript.  
49  
50  
51  
52  
53  
54  
55  
56  
57  
58  
59  
60

**Acknowledgements:** Not applicable.

## References

1. Kim J, Lee I, Lim S: **Overweight or obesity in children aged 0 to 6 and the risk of adult metabolic syndrome: A systematic review and meta-analysis.** *Journal of clinical nursing* 2017, **26**(23-24):3869-3880.
2. Lloyd LJ, Langley-Evans SC, McMullen S: **Childhood obesity and adult cardiovascular disease risk: a systematic review.** *International journal of obesity (2005)* 2010, **34**(1):18-28.
3. Perng W, Rifas-Shiman SL, Kramer MS, Haugaard LK, Oken E, Gillman MW, Belfort MB: **Early Weight Gain, Linear Growth, and Mid-Childhood Blood Pressure: A Prospective Study in Project Viva.** *Hypertension (Dallas, Tex : 1979)* 2016, **67**(2):301-308.
4. Gillman MW: **Early infancy as a critical period for development of obesity and related conditions.** *Nestle Nutrition workshop series Paediatric programme* 2010, **65**:13-20; discussion 20-14.
5. **Early childhood obesity prevention policies** [<http://www.iom.edu/Reports/2011/Early-Childhood-Obesity-Prevention-Policies.aspx>.]
6. Larson N, Ward DS, Neelon SB, Story M: **What role can child-care settings play in obesity prevention? A review of the evidence and call for research efforts.** *Journal of the American Dietetic Association* 2011, **111**(9):1343-1362.
7. **Let's Move! Child Care** [<https://letsmove.obamawhitehouse.archives.gov/child-care-providers>]
8. **Active start: A statement of physical activity guidelines for children from birth to age 5** [[www.shapeamerica.org/standards/guidelines/activestart.cfm](http://www.shapeamerica.org/standards/guidelines/activestart.cfm)]
9. American Academy of Pediatrics APHA, National Resource Center for Health and Safety in Child Care and Early Education: **Caring for Our Children: National Health and Safety Performance Standards; Guidelines for Early Care and Education Programs.** In., 3rd Edn. Elk Grove Village, IL: American Academy of Pediatrics; 2011.
10. Kakebeeke TH, Lanzi S, Zysset AE, Arhab A, Messerli-Burgy N, Stuelb K, Leeger-Aschmann CS, Schmutz EA, Meyer AH, Kriemler S *et al*: **Association between Body Composition and Motor Performance in Preschool Children.** *Obesity facts* 2017, **10**(5):420-431.
11. Graf C, Koch B, Kretschmann-Kandel E, Falkowski G, Christ H, Coburger S, Lehmacher W, Bjarnason-Wehrens B, Platen P, Tokarski W *et al*: **Correlation between BMI, leisure habits and motor abilities in childhood (CHILT-project).** *International journal of obesity and related metabolic disorders : journal of the International Association for the Study of Obesity* 2004, **28**(1):22-26.
12. Mond JM, Stich H, Hay PJ, Kraemer A, Baune BT: **Associations between obesity and developmental functioning in pre-school children: a population-based study.** *International journal of obesity (2005)* 2007, **31**(7):1068-1073.
13. Okely AD, Booth ML, Chey T: **Relationships between body composition and fundamental movement skills among children and adolescents.** *Research quarterly for exercise and sport* 2004, **75**(3):238-247.
14. Cawley J, Spiess CK: **Obesity and skill attainment in early childhood.** *Economics and human biology* 2008, **6**(3):388-397.

15. Benjamin Neelon SE, Oken E, Taveras EM, Rifas-Shiman SL, Gillman MW: **Age of achievement of gross motor milestones in infancy and adiposity at age 3 years.** *Maternal and child health journal* 2012, **16**(5):1015-1020.
16. Camargos ACR, Mendonca VA, Andrade CA, Oliveira KSC, Lacerda ACR: **Overweight and obese infants present lower cognitive and motor development scores than normal-weight peers.** *Research in developmental disabilities* 2016, **59**:410-416.
17. Shibli R, Rubin L, Akons H, Shaoul R: **Morbidity of overweight (>or=85th percentile) in the first 2 years of life.** *Pediatrics* 2008, **122**(2):267-272.
18. Slining M, Adair LS, Goldman BD, Borja JB, Bentley M: **Infant overweight is associated with delayed motor development.** *The Journal of pediatrics* 2010, **157**(1):20-25.e21.
19. **Relationship between physical growth and motor development in the WHO Child Growth Standards.** *Acta paediatrica (Oslo, Norway : 1992) Supplement* 2006, **450**:96-101.
20. Wells JC, Ritz P: **Physical activity at 9-12 months and fatness at 2 years of age.** *American journal of human biology : the official journal of the Human Biology Council* 2001, **13**(3):384-389.
21. Li R, O'Connor L, Buckley D, Specker B: **Relation of activity levels to body fat in infants 6 to 12 months of age.** *The Journal of pediatrics* 1995, **126**(3):353-357.
22. Benjamin Neelon SE, Ostbye T, Bennett GG, Kravitz RM, Clancy SM, Stroo M, Iversen E, Hoyo C: **Cohort profile for the Nurture Observational Study examining associations of multiple caregivers on infant growth in the Southeastern USA.** *BMJ open* 2017, **7**(2):e013939.
23. Bayley N: **Bayley scales of infant and toddler development: Bayley-III.** San Antonio, Texas, USA; Vol. 7. 2006.
24. **WHO Motor Development Study: windows of achievement for six gross motor development milestones.** *Acta paediatrica (Oslo, Norway : 1992) Supplement* 2006, **450**:86-95.
25. **WHO Child Growth Standards based on length/height, weight and age.** *Acta paediatrica (Oslo, Norway : 1992) Supplement* 2006, **450**:76-85.
26. Villar J, Altman DG, Purwar M, Noble JA, Knight HE, Ruyan P, Cheikh Ismail L, Barros FC, Lambert A, Papageorghiou AT *et al*: **The objectives, design and implementation of the INTERGROWTH-21st Project.** *BJOG : an international journal of obstetrics and gynaecology* 2013, **120** Suppl 2:9-26, v.
27. Fitzmaurice GM, Laird NM, Ware JH: **Applied longitudinal analysis**, vol. 998: John Wiley & Sons; 2012.
28. Murray GK, Veijola J, Moilanen K, Miettunen J, Glahn DC, Cannon TD, Jones PB, Isohanni M: **Infant motor development is associated with adult cognitive categorisation in a longitudinal birth cohort study.** *Journal of child psychology and psychiatry, and allied disciplines* 2006, **47**(1):25-29.
29. Schmidt Morgen C, Andersen AM, Due P, Neelon SB, Gamborg M, Sorensen TI: **Timing of motor milestones achievement and development of overweight in childhood: a study within the Danish National Birth Cohort.** *Pediatric obesity* 2014, **9**(4):239-248.
30. Cairney J, Hay JA, Faught BE, Hawes R: **Developmental coordination disorder and overweight and obesity in children aged 9-14 y.** *International journal of obesity (2005)* 2005, **29**(4):369-372.
31. Zeng N, Ayyub M, Sun H, Wen X, Xiang P, Gao Z: **Effects of Physical Activity on Motor Skills and Cognitive Development in Early Childhood: A Systematic Review.** *BioMed research international* 2017, **2017**:2760716.
32. Telford RM, Telford RD, Olive LS, Cochrane T, Davey R: **Why are girls less physically active than boys? Findings from the LOOK longitudinal study.** *PloS one* 2016, **11**(3):e0150041.
33. Fields DA, Krishnan S, Wisniewski AB: **Sex differences in body composition early in life.** *Gender medicine* 2009, **6**(2):369-375.

- 1  
2  
3  
4  
5  
6  
7  
8  
9  
10  
11  
12  
13  
14  
15  
16  
17  
18  
19  
20  
21  
22  
23  
24  
25  
26  
27  
28  
29  
30  
31  
32  
33  
34  
35  
36  
37  
38  
39  
40  
41  
42
34. Eriksson B, Lof M, Forsum E: **Body composition in full-term healthy infants measured with air displacement plethysmography at 1 and 12 weeks of age.** *Acta paediatrica (Oslo, Norway : 1992)* 2010, **99**(4):563-568.
  35. Dewey KG, Cohen RJ, Brown KH, Rivera LL: **Effects of exclusive breastfeeding for four versus six months on maternal nutritional status and infant motor development: results of two randomized trials in Honduras.** *The Journal of nutrition* 2001, **131**(2):262-267.
  36. Michels KA, Ghassabian A, Mumford SL, Sundaram R, Bell EM, Bello SC, Yeung EH: **Breastfeeding and motor development in term and preterm infants in a longitudinal US cohort.** *The American journal of clinical nutrition* 2017, **106**(6):1456-1462.
  37. **Centers of Disease Control and Prevention website. Accessed Agust 1, 2018.** [<https://www.cdc.gov/breastfeeding/data/facts.html>]
  38. Taanila A, Murray GK, Jokelainen J, Isohanni M, Rantakallio P: **Infant developmental milestones: a 31-year follow-up.** *Developmental medicine and child neurology* 2005, **47**(9):581-586.
  39. Murray GK, Jones PB, Kuh D, Richards M: **Infant developmental milestones and subsequent cognitive function.** *Annals of neurology* 2007, **62**(2):128-136.
  40. Flensburg-Madsen T, Mortensen EL: **Infant developmental milestones and adult intelligence: A 34-year follow-up.** *Early human development* 2015, **91**(7):393-400.
  41. Kuh D, Hardy R, Butterworth S, Okell L, Richards M, Wadsworth M, Cooper C, Sayer AA: **Developmental origins of midlife physical performance: evidence from a British birth cohort.** *American journal of epidemiology* 2006, **164**(2):110-121.
  42. Kuh D, Hardy R, Butterworth S, Okell L, Wadsworth M, Cooper C, Aihie Sayer A: **Developmental origins of midlife grip strength: findings from a birth cohort study.** *The journals of gerontology Series A, Biological sciences and medical sciences* 2006, **61**(7):702-706.
  43. Fuemmeler BF, Lee CT, Soubry A, Iversen ES, Huang Z, Murtha AP, Schildkraut JM, Jirtle RL, Murphy SK, Hoyo C: **DNA Methylation of Regulatory Regions of Imprinted Genes at Birth and Its Relation to Infant Temperament.** *Genetics & epigenetics* 2016, **8**:59-67.
  44. Akinbami LJ, Kit BK, Carroll MD, Fakhouri THI, Ogden CL: **Trends in Anthropometric Measures Among US Children 6 to 23 Months, 1976-2014.** *Pediatrics* 2017, **139**(3).
  45. Hawkins SS, Rifas-Shiman SL, Gillman MW, Taveras EM: **Racial differences in crossing major growth percentiles in infancy.** *Archives of disease in childhood* 2017.
  46. Han A, Fu A, Cobley S, Sanders RH: **Effectiveness of exercise intervention on improving fundamental movement skills and motor coordination in overweight/obese children and adolescents: A systematic review.** *Journal of science and medicine in sport* 2018, **21**(1):89-102.

## 43 Figures

44  
45  
46  
47  
48  
49  
50  
51  
52  
53  
54  
55  
56  
57  
58  
59  
60

Figure 1: Mean trajectories of motor development score (a) and weight-for-length z-score (b) throughout infancy

1  
2  
3  
4  
5  
6  
7  
8 **Tables**  
9

10 **Table 1. Characteristics of mothers and infants participating in the Nurture study (n=433)**  
11

| <b>Infant Characteristics</b>                                 | <b><i>Mean (SD)</i></b>        |
|---------------------------------------------------------------|--------------------------------|
| Birth weight for gestational age z-score                      | -0.3 (1.0)                     |
| Age at 12-month home visit, days                              | 373.9 (23.6)                   |
| Weight-for-length z-score at 12 months                        | 0.6 (1.0)                      |
| Any breastfeeding, weeks                                      | 17.6 (19.7)                    |
| Motor development composite score at 12 months                | 97.9 (10.7)                    |
|                                                               | <b><i>Percent (number)</i></b> |
| Gender, female                                                | 50.6 (219)                     |
| Race                                                          |                                |
| Black                                                         | 64.7 (280)                     |
| White                                                         | 18.5 (80)                      |
| Other race/more than one race                                 | 16.9 (73)                      |
| Ethnicity, Latino/a                                           | 9.0 (37)                       |
| <b>Weight-for-length z-score at 12 months by WHO category</b> |                                |
| Severely wasted (severely underweight)                        | —                              |
| Wasted (underweight)                                          | 0.5 (2)                        |
| Normal                                                        | 66.5 (288)                     |
| Possible risk of overweight                                   | 24.7 (107)                     |
| Overweight                                                    | 6.7 (29)                       |

|                                                  |                            |
|--------------------------------------------------|----------------------------|
| Obese                                            | 1.6 (7)                    |
| <b>Age of rolling over</b>                       |                            |
| 4 months and younger                             | 72.1 (312)                 |
| Older than 4 months                              | 27.9 (121)                 |
| <b>Age of sitting up</b>                         |                            |
| 5 months and younger                             | 44.3 (192)                 |
| 5-6 months                                       | 33.0 (143)                 |
| Older than 6 months                              | 22.6 (98)                  |
| <b>Age of crawling</b>                           |                            |
| 6 months and younger                             | 19.9 (86)                  |
| 7-8 months                                       | 40.4 (175)                 |
| Older than 8 months                              | 39.7 (172)                 |
| <b>Age of walking</b>                            |                            |
| 11 months and younger                            | 34.7 (150)                 |
| 12 months                                        | 28.9 (125)                 |
| Older than 12                                    | 36.3 (157)                 |
| <b>Maternal Characteristics</b>                  | <b>Mean (SD)</b>           |
| Age, years                                       | 28.1 (5.8)                 |
| Pre-pregnancy body mass index, kg/m <sup>2</sup> | 30.6 (9.3)                 |
|                                                  | <b>Percent (frequency)</b> |
| <b>Race</b>                                      |                            |
| Black                                            | 67.4 (292)                 |
| White                                            | 22.2 (96)                  |



|                                                    |                            |
|----------------------------------------------------|----------------------------|
| Other race/more than one race                      | 10.4 (45)                  |
| Ethnicity, Latina                                  | 5.6 (24)                   |
| Education                                          |                            |
| ≤High school graduate                              | 44.1 (191)                 |
| Some college, college graduate, or graduate degree | 55.9 (242)                 |
| Marital status                                     |                            |
| Married or living with partner                     | 59.1 (253)                 |
| Never married, divorced, separated, other          | 40.9 (175)                 |
| <b>Household Characteristics</b>                   | <b>Percent (frequency)</b> |
| Annual household income                            |                            |
| < \$20,000                                         | 38.3 (166)                 |
| ≥ \$20,000                                         | 61.7 (267)                 |

WHO; World Health Organization

**Table 2. Adjusted<sup>a</sup> longitudinal regression estimates and 95% confidence intervals (CI) in analyses examining motor development score and subsequent weight-for-length z-score from 3 to 12 months**

| Motor development score     | Infant weight-for-length z-score |        |        |         |
|-----------------------------|----------------------------------|--------|--------|---------|
|                             | Estimate                         | 95% CI |        | p-value |
| All infants (n=425)         | -0.004                           | -0.007 | -0.001 | 0.03    |
| Male infants only (n=213)   | -0.007                           | -0.01  | -0.001 | 0.03    |
| Female infants only (n=211) | 0.001                            | -0.005 | 0.008  | 0.62    |

| <b>Gross motor development score</b> |       |        |        |      |
|--------------------------------------|-------|--------|--------|------|
| All infants (n=425)                  | -0.02 | -0.031 | -0.004 | 0.01 |
| Male infants only (n=213)            | -0.03 | -0.06  | -0.003 | 0.03 |
| Female infants only (n=211)          | 0.005 | -0.02  | 0.034  | 0.74 |

<sup>a</sup>Adjusted for maternal pre-pregnancy body mass index, age, and education; household income; infant race, gender, birth weight for gestational age z-score, breastfeeding, and motor development score at previous visit.

**Table 3. Adjusted<sup>a</sup> longitudinal regression estimates and 95% confidence intervals (CI) in analyses examining motor milestone achievement and subsequent weight-for-length z-score from 3 to 12 months**

| <b>Age of motor milestone achievement</b> | <b>Estimate</b> | <b>95% CI</b> |       | <b>p-value</b> |
|-------------------------------------------|-----------------|---------------|-------|----------------|
| <b>All infants (n=425)</b>                |                 |               |       |                |
| Rolling over (ref=older than 4 months)    |                 |               |       |                |
| 4 months or younger                       | -0.19           | -0.40         | 0.008 | 0.06           |
| Sitting up (ref=older than 6 months)      |                 |               |       |                |
| 5 months or younger                       | 0.19            | -0.06         | 0.43  | 0.13           |
| 5 to 6 months                             | 0.22            | -0.03         | 0.48  | 0.09           |
| Crawling (ref=9 months and older)         |                 |               |       |                |
| 6 months or younger                       | -0.34           | -0.59         | -0.09 | 0.008          |
| 7 to 8 months                             | 0.01            | -0.20         | 0.21  | 0.94           |
| Walking (ref=older than 12 months)        |                 |               |       |                |
| 11 months and younger                     | -0.17           | -0.39         | 0.06  | 0.14           |

|                                        |       |       |       |      |
|----------------------------------------|-------|-------|-------|------|
| 12 months                              | 0.13  | -0.10 | 0.37  | 0.27 |
| <b>Male infants only (n=208)</b>       |       |       |       |      |
| Rolling over (ref=older than 4 months) |       |       |       |      |
| 4 months or younger                    | -0.29 | -0.60 | 0.02  | 0.06 |
| Sitting up (ref=older than 6 months)   |       |       |       |      |
| 5 months or younger                    | 0.18  | -0.17 | 0.54  | 0.31 |
| 5 to 6 months                          | 0.27  | -0.10 | 0.64  | 0.15 |
| Crawling (ref=9 months and older)      |       |       |       |      |
| 6 months or younger                    | -0.46 | -0.83 | -0.10 | 0.01 |
| 7 to 8 months                          | -0.06 | -0.37 | 0.25  | 0.91 |
| Walking (ref=older than 12 months)     |       |       |       |      |
| 11 months and younger                  | -0.09 | -0.44 | 0.26  | 0.63 |
| 12 months                              | 0.08  | -0.28 | 0.44  | 0.66 |
| <b>Female infants only (n=217)</b>     |       |       |       |      |
| Rolling over (ref=older than 4 months) |       |       |       |      |
| 4 months or younger                    | -0.12 | -0.40 | 0.16  | 0.39 |
| Sitting up (ref=older than 6 months)   |       |       |       |      |
| 5 months or younger                    | 0.18  | -0.16 | 0.52  | 0.30 |
| 5 to 6 months                          | 0.16  | -0.20 | 0.53  | 0.37 |
| Crawling (ref=9 months and older)      |       |       |       |      |
| 6 months or younger                    | -0.27 | -0.63 | 0.08  | 0.13 |
| 7 to 8 months                          | 0.05  | -0.24 | 0.33  | 0.75 |
| Walking (ref=older than 12 months)     |       |       |       |      |

|                       |       |       |      |      |
|-----------------------|-------|-------|------|------|
| 11 months and younger | -0.25 | -0.56 | 0.05 | 0.10 |
| 12 months             | 0.20  | -0.14 | 0.54 | 0.24 |

<sup>a</sup>Adjusted for maternal pre-pregnancy body mass index, age, and education; household income; infant race, gender, birth weight for gestational age z-score, and breastfeeding.

For peer review only

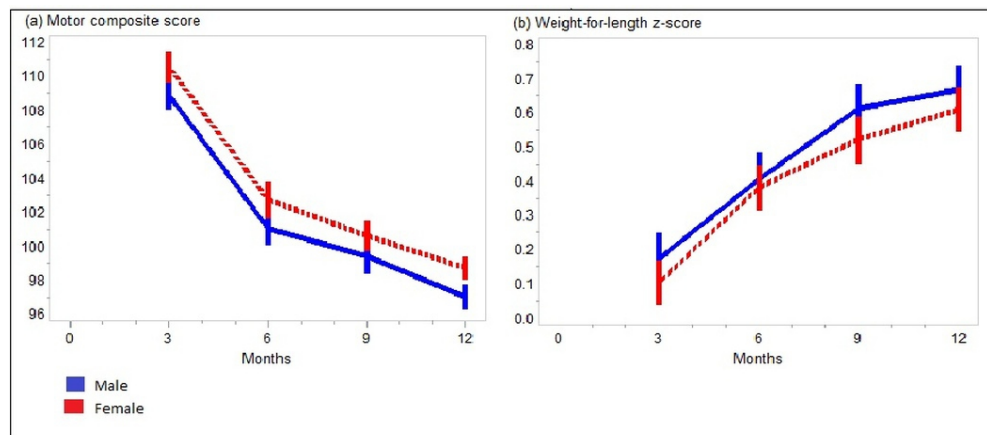

Mean trajectories of motor development score (a) and weight-for-length z-score (b) throughout infancy

90x39mm (300 x 300 DPI)

STROBE Statement—Checklist of items that should be included in reports of *cohort studies*

|                           | Item No | Recommendation                                                                                                                                                                                    | Page/line    |
|---------------------------|---------|---------------------------------------------------------------------------------------------------------------------------------------------------------------------------------------------------|--------------|
| <b>Title and abstract</b> | 1       | (a) Indicate the study's design with a commonly used term in the title or the abstract                                                                                                            | 1/5 and 1/15 |
|                           |         | (b) Provide in the abstract an informative and balanced summary of what was done and what was found                                                                                               | 2            |
| <b>Introduction</b>       |         |                                                                                                                                                                                                   |              |
| Background/rationale      | 2       | Explain the scientific background and rationale for the investigation being reported                                                                                                              | 4/5-45       |
| Objectives                | 3       | State specific objectives, including any prespecified hypotheses                                                                                                                                  | 4/45-52      |
| <b>Methods</b>            |         |                                                                                                                                                                                                   |              |
| Study design              | 4       | Present key elements of study design early in the paper                                                                                                                                           | 5/5-24       |
| Setting                   | 5       | Describe the setting, locations, and relevant dates, including periods of recruitment, exposure, follow-up, and data collection                                                                   | 5/15-35      |
| Participants              | 6       | (a) Give the eligibility criteria, and the sources and methods of selection of participants. Describe methods of follow-up                                                                        | 5/35-52      |
|                           |         | (b) For matched studies, give matching criteria and number of exposed and unexposed                                                                                                               | NA           |
| Variables                 | 7       | Clearly define all outcomes, exposures, predictors, potential confounders, and effect modifiers. Give diagnostic criteria, if applicable                                                          | 6-8          |
| Data sources/measurement  | 8*      | For each variable of interest, give sources of data and details of methods of assessment (measurement). Describe comparability of assessment methods if there is more than one group              | 6-8          |
| Bias                      | 9       | Describe any efforts to address potential sources of bias                                                                                                                                         | 8/45-9/3     |
| Study size                | 10      | Explain how the study size was arrived at                                                                                                                                                         | 5/36-45      |
| Quantitative variables    | 11      | Explain how quantitative variables were handled in the analyses. If applicable, describe which groupings were chosen and why                                                                      | 7/22-27      |
| Statistical methods       | 12      | (a) Describe all statistical methods, including those used to control for confounding                                                                                                             | 8-9          |
|                           |         | (b) Describe any methods used to examine subgroups and interactions                                                                                                                               | 9/13-15      |
|                           |         | (c) Explain how missing data were addressed                                                                                                                                                       | 5/36-45      |
|                           |         | (d) If applicable, explain how loss to follow-up was addressed                                                                                                                                    | Ref 22**     |
|                           |         | (e) Describe any sensitivity analyses                                                                                                                                                             | NA           |
| <b>Results</b>            |         |                                                                                                                                                                                                   |              |
| Participants              | 13*     | (a) Report numbers of individuals at each stage of study—eg numbers potentially eligible, examined for eligibility, confirmed eligible, included in the study, completing follow-up, and analysed | Ref 22**     |
|                           |         | (b) Give reasons for non-participation at each stage                                                                                                                                              | Ref 22**     |
|                           |         | (c) Consider use of a flow diagram                                                                                                                                                                | Ref 22**     |
| Descriptive data          | 14*     | (a) Give characteristics of study participants (eg demographic, clinical, social) and information on exposures and potential confounders                                                          | 9/38-27      |
|                           |         | (b) Indicate number of participants with missing data for each variable of interest                                                                                                               | 5/36-45      |
|                           |         | (c) Summarise follow-up time (eg, average and total amount)                                                                                                                                       | 5/36-45      |
| Outcome data              | 15*     | Report numbers of outcome events or summary measures over time                                                                                                                                    | 9/52-10/27   |
| Main results              | 16      | (a) Give unadjusted estimates and, if applicable, confounder-adjusted                                                                                                                             | 10/35-       |

|                          |    |                                                                                                                                                                            |             |
|--------------------------|----|----------------------------------------------------------------------------------------------------------------------------------------------------------------------------|-------------|
|                          |    | estimates and their precision (eg, 95% confidence interval). Make clear which confounders were adjusted for and why they were included                                     | 11/27       |
|                          |    | (b) Report category boundaries when continuous variables were categorized                                                                                                  | NA          |
|                          |    | (c) If relevant, consider translating estimates of relative risk into absolute risk for a meaningful time period                                                           | NA          |
| Other analyses           | 17 | Report other analyses done—eg analyses of subgroups and interactions, and sensitivity analyses                                                                             | NA          |
| <b>Discussion</b>        |    |                                                                                                                                                                            |             |
| Key results              | 18 | Summarise key results with reference to study objectives                                                                                                                   | 11/37-47    |
| Limitations              | 19 | Discuss limitations of the study, taking into account sources of potential bias or imprecision. Discuss both direction and magnitude of any potential bias                 | 14/40-15/9  |
| Interpretation           | 20 | Give a cautious overall interpretation of results considering objectives, limitations, multiplicity of analyses, results from similar studies, and other relevant evidence | 11/47-14/36 |
| Generalisability         | 21 | Discuss the generalisability (external validity) of the study results                                                                                                      | 14/40-47    |
| <b>Other information</b> |    |                                                                                                                                                                            |             |
| Funding                  | 22 | Give the source of funding and the role of the funders for the present study and, if applicable, for the original study on which the present article is based              | 16/36       |

\*Give information separately for exposed and unexposed groups.

\*\* A detailed description of the Nurture study cohort is discussed and published previously and referenced in this manuscript- Reference number [22]. (Benjamin Neelon SE, Ostbye T, Bennett GG, Kravitz RM, Clancy SM, Stroo M, Iversen E, Hoyo C: Cohort profile for the Nurture Observational Study examining associations of multiple caregivers on infant growth in the Southeastern USA. *BMJ open* 2017, 7(2):e013939)

**Note:** An Explanation and Elaboration article discusses each checklist item and gives methodological background and published examples of transparent reporting. The STROBE checklist is best used in conjunction with this article (freely available on the Web sites of PLoS Medicine at <http://www.plosmedicine.org/>, *Annals of Internal Medicine* at <http://www.annals.org/>, and *Epidemiology* at <http://www.epidem.com/>). Information on the STROBE Initiative is available at <http://www.strobe-statement.org>.
